# Supplementary material for: Syndecan-1 Promotes Hepatocyte-Like Differentiation of Hepatoma Cells Targeting Ets-1 and AP-1
Source: PubMed Central journal article supplement (PMC7598270; doi:10.3390/biom10101356), 2020-09-23
Supplement: biomolecules-10-01356-s001.pdf [file biomolecules-10-01356-s001.pdf]

Article

# Syndecan-1 promotes hepatocyte-like differentiation of hepatoma cells targeting Ets-1 and AP-1

Péter Hollósi <sup>1,2†</sup>, Lóránd Váncza <sup>1†</sup>, Katalin Karászi <sup>1†</sup>, Katalin Dobos <sup>1</sup>, Bálint Péterfia <sup>1,3</sup>, Enikő Tátrai <sup>1,4</sup>, Péter Tátrai <sup>1,5</sup>, Tibor Szarvas <sup>1,6,7</sup>, Sándor Paku <sup>1</sup>, László Szilák <sup>8</sup> and Ilona Kovalszky <sup>1,\*</sup>

<sup>1</sup> First Department of Pathology and Experimental Cancer Research, Semmelweis University, Üllői út 26, H-1085 Budapest, Hungary; phollosi@yahoo.com (P.H.); vancza\_lorand@yahoo.com (L.V.); tika0604@gmail.com (K.K.); kdobos@gmail.com (K.D.); peterfiab@gmail.com (P.B.); tatraien@gmail.com (E.T.); soobaab@gmail.com (P.T.); sztibusz@gmail.com (T.S.); paku.sandor@med.semmelweis-univ.hu (S.P.); kovalszky.ilona@med.semmelweis-univ.hu (I.K.)

<sup>2</sup> Tumor Progression Research Group of Joint Research Organization of Hungarian Academy of Sciences and Semmelweis University, Széchenyi István tér 9, H-1051 Budapest, Hungary;

<sup>3</sup> Faculty of Information Technology and Bionics, Pázmány Péter Catholic University, Práter u. 50/A, H-1083 Budapest, Hungary;

<sup>4</sup> Department of Experimental Pharmacology, National Institute of Oncology, Ráth György utca 7-9, H-1122 Budapest, Hungary;

<sup>5</sup> Solvo Biotechnology, Irinyi József utca 4-20, H-1117 Budapest, Hungary;

<sup>6</sup> Department of Urology, Semmelweis University, Üllői út 78/B, H-1082 Budapest, Hungary;

<sup>7</sup> Department of Urology, West German Cancer Center, University of Duisburg-Essen, University Hospital Essen, Hufelandstr. 55, 45147, Essen, Germany;

<sup>8</sup> Szilak Laboratories Bioinformatics and Molecule-Design, Gem utca 14, H-6723 Szeged, Hungary; laszlo.szilak@gmail.com (L.S.)

\* Correspondence: kovalszky.ilona@med.semmelweis-univ.hu; Tel.: +36-1-459-1500 (ext. 54449)

† These authors contributed equally to this paper.

Supplementary information.

## Contents

**Table S1.** qRT-PCR primer and oligo sequences.

**Table S2.** Antibodies used.

**Figure S1.** Expression of c-Met in HepG2 and Hep3B cells.

**Figure S2.** Zymography of HepG2 and Hep3B conditioned cell media.

**Figure S3.** PMA treated HepG2 conditioned cell media.

**Table S1.** qRT-PCR primer and oligo sequences.

| Gene                 | Primer /oligo | Sequence (5'-3')                                                                                          | Amplicon length (bp) |
|----------------------|---------------|-----------------------------------------------------------------------------------------------------------|----------------------|
| <i>MMP7</i>          | F             | GTGGTCACCTACAGGATCGTA                                                                                     | 492                  |
|                      | R             | CTGAAGTTTCTATTTCTTTCTTGA                                                                                  |                      |
| <i>ETS1</i>          | F             | TTCACTAAAGAACAGCAAC                                                                                       | 205                  |
|                      | R             | TGTCCCAACAAAGTCTG                                                                                         |                      |
| <i>Syndecan-1 ED</i> | F             | GCTGACCTTCACACTCCCA                                                                                       | 124                  |
|                      | R             | CAAAGGTGAAGTCCTGCTCC                                                                                      |                      |
| <i>Syndecan-1 CD</i> | F             | GAAGAAGGACGAAGGCAG                                                                                        | 83                   |
|                      | R             | CCTCCTGTTTGGTGGC                                                                                          |                      |
| <i>miR-lacZ</i>      | S             | TGCTGAAATCGCTGATTTGTGTAGTCGTTTTGGC<br>CACTGACTGACGACTACACATCAGCGATT                                       | -                    |
|                      | A             | CCTGAAATCGCTGATGTGTAGTCGTCAGTCAGT<br>GGCCAAAACGACTACACAAATCAGCGATTTC<br>TGCTGAATAGTGGACATCTGCACATGTTTTGGC |                      |
| <i>miR-362</i>       | S             | CACTGACTGACATGTGCAGGTCCCACTATTG                                                                           | -                    |
|                      | A             | CCTGAATAGTGGGACCTGCACATGTCAGTCAGT<br>GGCCAAAACATGTGCAGATGTCCCACTATTC                                      |                      |
| <i>miR-641</i>       | S             | TGCTGTCTAGATGTTCCATAAGATGGTTTTGG<br>CCACTGACTGACCATCTTATGAACATCTAGA                                       | -                    |
|                      | A             | CCTGTCTAGATGTTCCATAAGATGGTCAGTCAGT<br>GGCCAAAACCATCTTATGGGAACATCTAGAC                                     |                      |

**Abbreviations:** F: forward primer, R: reverse primer, S: sense oligo, A: antisense oligo, bp: base pair; ED: ectodomain, CD: cytoplasmic domain

Table S2. Antibodies used.

| Primary antibody                                 | Host species, isotype                         | Manufacturer*                   | Cat. No.    | Dilution |         |
|--------------------------------------------------|-----------------------------------------------|---------------------------------|-------------|----------|---------|
|                                                  |                                               |                                 |             | IF#      | blot#   |
| p38 MAPK                                         | rabbit polyclonal IgG                         | Cell Signaling Technology       | 9212        | -        | 1:500   |
| phospho-p38 MAPK (Thr180/Tyr182) XP®             | rabbit monoclonal IgG, clone D3F9             | Cell Signaling Technology       | 4511        | -        | 1:500   |
| p44/42 MAPK (Erk1/2)                             | rabbit polyclonal IgG                         | Cell Signaling Technology       | 9102        | -        | 1:500   |
| phospho-p44/42 MAPK (Erk1/2) (Thr202/Tyr204) XP® | rabbit monoclonal IgG, clone D13.14.4E        | Cell Signaling Technology       | 4370        | -        | 1:500   |
| Syndecan-1 (ectodomain)                          | mouse monoclonal IgG, clone B-B4              | AbD Serotec                     | MCA681      | 1:100    | -       |
| Ets-1 (C-20)                                     | rabbit polyclonal IgG                         | Santa Cruz Biotechnology        | sc-350      | 1:100    | 1:500   |
| Desmoplakin                                      | rabbit polyclonal IgG                         | Abcam                           | ab14418     | 1:100    | -       |
| Albumin                                          | rabbit polyclonal IgG                         | Dako                            | a0001       | 1:100    | -       |
| Heparan sulfate (HS4C3)                          | Phage display antibody containing a VSV-G tag | kind gift from TH van Kuppevelt | -           | 1:2      | -       |
| Heparan sulfate (AO4B08)                         | Phage display antibody containing a VSV-G tag | kind gift from TH van Kuppevelt | -           | 1:2      | -       |
| Vesicular stomatitis virus glycoprotein (VSV-G)  | mouse monoclonal IgG, clone P5D4              | Sigma-Aldrich Co.               | SAB4200 695 | 1:100    | -       |
| MMP-7                                            | rabbit polyclonal IgG                         | Sigma-Aldrich Co.               | AV46075     | 1:100    | -       |
| Met (c-28)                                       | rabbit polyclonal IgG                         | Santa Cruz Biotechnology        | sc-161      | -        | 1:500   |
| Secondary antibody                               | Host species, isotype                         | Manufacturer*                   | Cat. No.    | Dilution |         |
| Anti-rabbit Ig/HRP                               | Goat polyclonal                               | Dako Cytomation                 | P0448       | -        | 1:2,000 |
| Alexa Fluor® 568 anti-rabbit IgG (H+L)           | Goat polyclonal                               | Invitrogen                      | A11011      | 1:200    | -       |
| Alexa Fluor® 568 anti-mouse IgG (H+L)            | Goat polyclonal                               | Invitrogen                      | A11004      | 1:200    | -       |
| Alexa Fluor® 488 anti-rabbit IgG (H+L)           | Goat polyclonal                               | Invitrogen                      | A11008      | 1:200    | -       |

\* Cell Signaling Technology, Danvers, MA, USA; AbD Serotec Kidlington, UK; Santa Cruz Biotechnology, Inc Dallas, TX, USA; Abcam, Cambridge, UK; Dako/DakoCytomation, Agilent Technologies, Inc., Santa Clara, CA, USA; Invitrogen by Life Technologies, Carlsbad, CA, USA; Sigma-Aldrich Co., St. Louis, MO, USA; kind gift from TH van Kuppevelt; Nijmegen, The Netherlands

#IF: immunofluorescent cytochemistry, **blot**: Western blot or dot blot

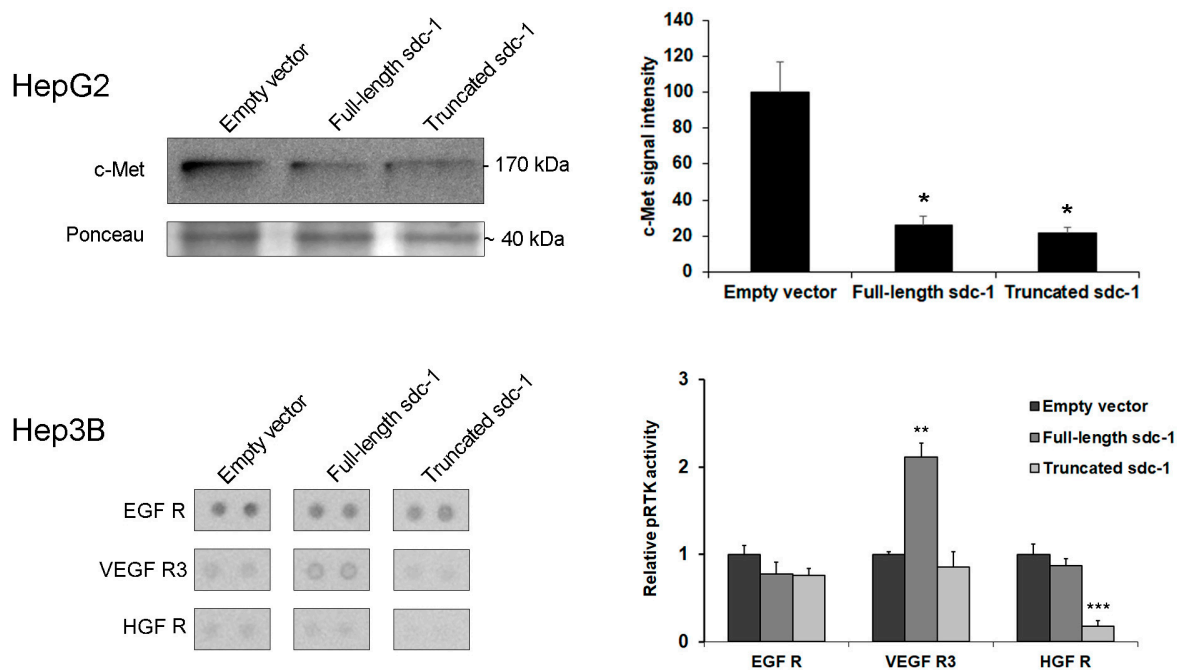

**Figure S1.** Expression of c-Met in HepG2 and Hep3B cells. Western blot of c-Met of HepG2 and pRTK array of Hep3B showing expression of EGFR, VEGFR3 and HGFR. Data points represent the mean  $\pm$  SD,  $n = 2$ ; \*  $p < 0.05$ ; \*\*  $p < 0.01$ ; \*\*\*  $p < 0.001$  versus empty vector transfectant.

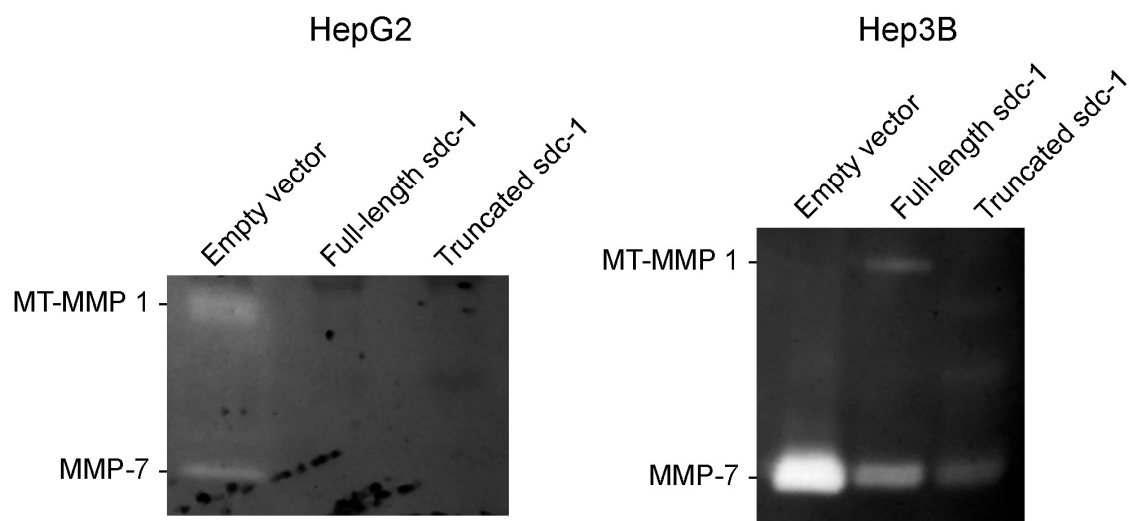

**Figure S2.** Zymography of HepG2 and Hep3B conditioned cell media.

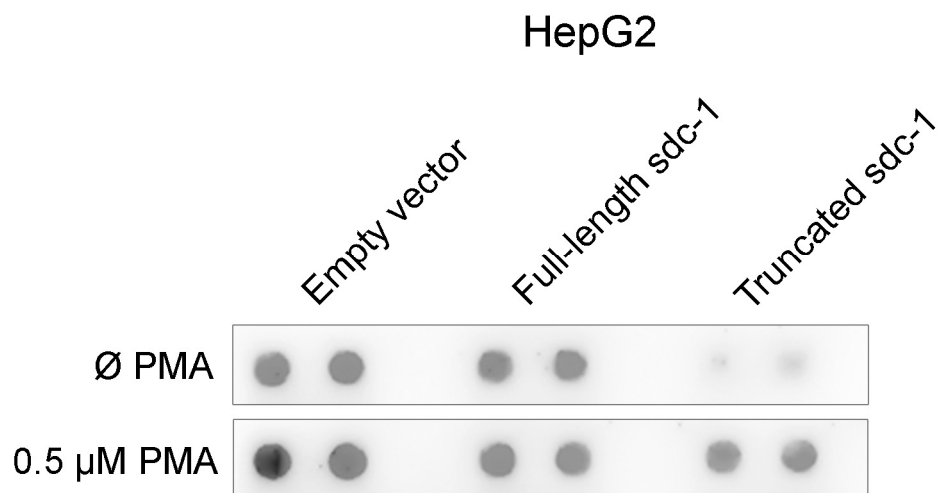

**Figure S3.** PMA treated HepG2 conditioned cell media.
